# Supplementary material
Source: HighWire-hosted journal article supplement (https://www.life-science-alliance.org/content/6/5/e202201825/F5)

Source Data: Figure 3 D

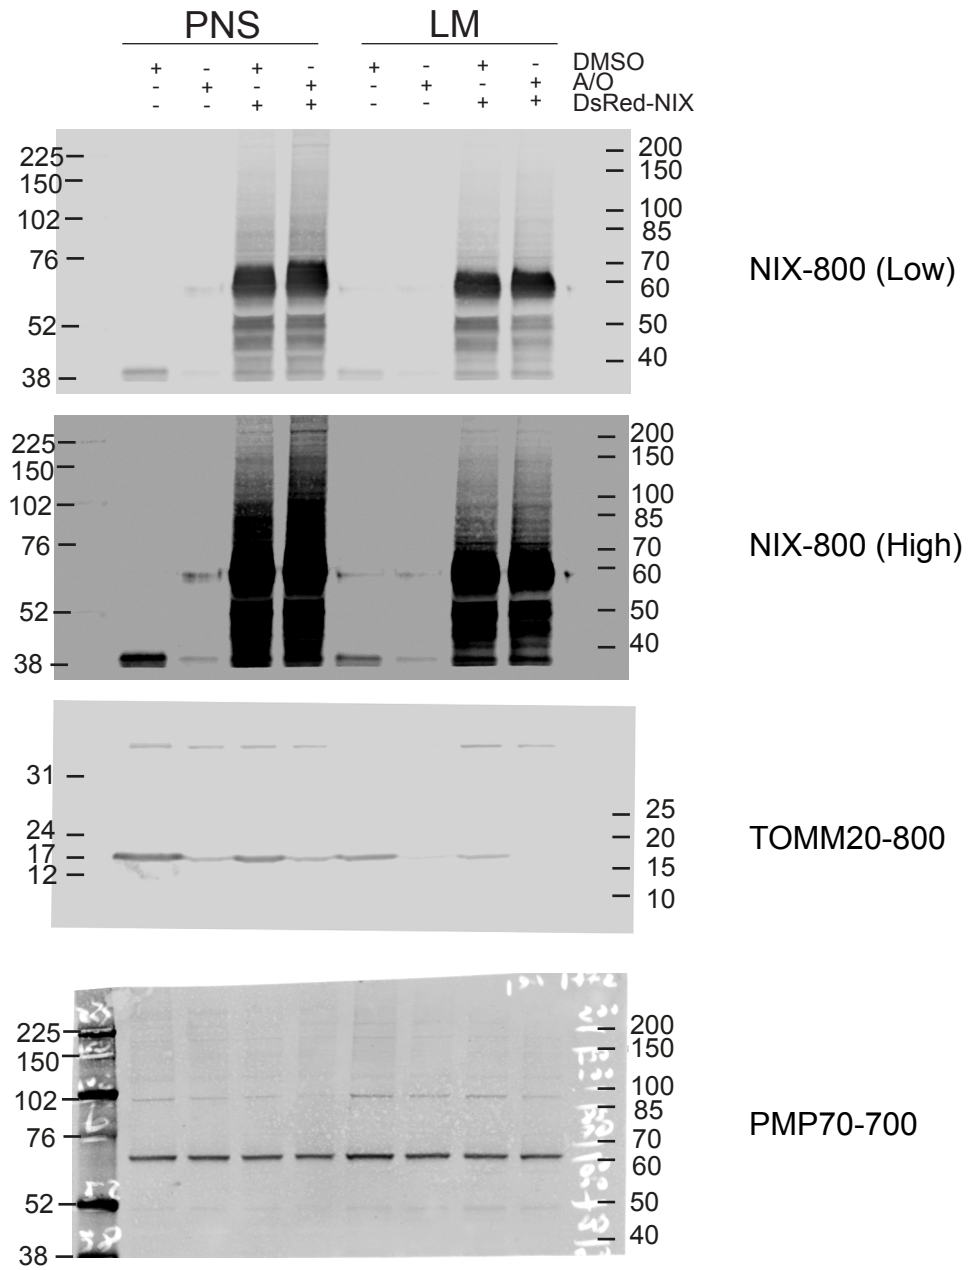

Supplement: inline-supplementary-material-3 [file inline-supplementary-material-3.pdf]
